# Supplementary material for: Antiplatelet aggregation and antithrombotic benefits of terpenes and flavones from hawthorn leaf extract isolated using the activity-guided method
Source: Royal Society of Chemistry journal article supplement (doi:10.1039/c8fo01862f), 2019-01-01

**Electronic Supplementary Information**

**Antiplatelet aggregation and antithrombotic benefits of terpenes  
and flavones from hawthorn leaf extract isolated using activity-  
guided method**

Pinyi Gao <sup>a,b, #</sup>, Shuangshuang Li <sup>a,#</sup>, Kechun Liu<sup>d</sup>, Chen Sun<sup>d</sup>, Shaojiang Song <sup>a</sup> and  
Lingzhi Li <sup>a,\*</sup>

<sup>a</sup> *School of Traditional Chinese Materia Medica, Key Laboratory of Computational Chemistry-Based Natural Antitumor Drug Research & Development, Liaoning Province, Shenyang Pharmaceutical University, Shenyang 110016, China*

<sup>b</sup> *College of Pharmaceutical and Biotechnology Engineering, Shenyang University of Chemical Technology, Shenyang 110142, People's Republic of China*

<sup>c</sup> *Biology Institute of Shandong Academy of Sciences, Jinan, People's Republic of China*

**Supp 1-1** Antiplatelet aggregation activities of different fractions at the dose of 250 $\mu$ g mL<sup>-1</sup>

**Supp 1-2** Antithrombotic activity of different fractions on transgenic zebrafish system

**Supp 2-1** Antiplatelet aggregation activities of compounds **1-7, 10, 11, 17, 20, 23**

**Supp 2-2** Antiplatelet aggregation activities of compounds **8, 12, 13, 15, 16, 18, 19, 21, 22, 24, 25** from the reference

**Supp 3-1** Antithrombotic activity of compounds **1, 7, 12** on transgenic zebrafish system

**Supp 3-2** Antithrombotic activity of compounds **8, 15, 22, 24** on transgenic zebrafish system from the reference

**Supp 4** The base peak intensity (BPI) chromatogram of some compounds under negative ion mode.

**Supp 5** The base peak intensity (BPI) chromatogram of mixed reference compounds in positive ion mode by HPLC-QTOF-MS. The mixed A were reference compounds **1-7, 9-11, 24**. The mixed B were reference compounds **12, 14-17, 19-23**.

**Supp 1-1** Antiplatelet aggregation activities of different fractions at the dose of 250 $\mu\text{g mL}^{-1}$

| Fractions | Dosage ( $\mu\text{g mL}^{-1}$ ) | Inhibition rate (%) <sup>a</sup> | Fractions | Dosage ( $\mu\text{g mL}^{-1}$ ) | Inhibition rate (%) <sup>a</sup> |
|-----------|----------------------------------|----------------------------------|-----------|----------------------------------|----------------------------------|
| LP        | 250                              | 55.23 $\pm$ 3.31                 | Fr.C-1    | 250                              | 91.52 $\pm$ 9.16                 |
| Fr.B      | 250                              | 63.19 $\pm$ 2.12                 | Fr.C-2    | 250                              | 72.47 $\pm$ 5.90                 |
| Fr.C      | 250                              | 77.85 $\pm$ 7.64                 | Fr.C-3    | 250                              | 35.57 $\pm$ 8.17                 |
| Fr.D      | 250                              | 6.61 $\pm$ 12.61                 | Aspirin   | 250                              | 88.34 $\pm$ 5.01                 |

**Supp 1-2** Antithrombotic activity of different fractions on transgenic zebrafish system

| Fractions                   | Dosage                    | Thrombosis time <sup>a</sup> | Fractions | Dosage                    | Thrombosis time <sup>a</sup> |
|-----------------------------|---------------------------|------------------------------|-----------|---------------------------|------------------------------|
| control                     | 0.1% DMSO                 | 4.40 $\pm$ 0.40              | Fr.C      | 50 $\mu\text{g mL}^{-1}$  | 6.80 $\pm$ 0.73              |
|                             |                           |                              |           | 100 $\mu\text{g mL}^{-1}$ | 11.60 $\pm$ 1.60*            |
| Heparin Sodium <sup>b</sup> | 20U/ml                    | 11.40 $\pm$ 0.51*            | Fr.C-1    | 50 $\mu\text{g mL}^{-1}$  | 9.60 $\pm$ 0.40*             |
|                             |                           |                              |           | 150 $\mu\text{g mL}^{-1}$ | 11.60 $\pm$ 0.75*            |
| LP                          | 50 $\mu\text{g mL}^{-1}$  | 6.80 $\pm$ 0.86              | Fr.C-2    | 50 $\mu\text{g mL}^{-1}$  | 6.80 $\pm$ 0.73              |
|                             | 150 $\mu\text{g mL}^{-1}$ | 5.20 $\pm$ 0.49              |           | 150 $\mu\text{g mL}^{-1}$ | 11.20 $\pm$ 0.58*            |
| Fr.B                        | 50 $\mu\text{g mL}^{-1}$  | 6.00 $\pm$ 0.55              | Fr.C-3    | 50 $\mu\text{g mL}^{-1}$  | 5.20 $\pm$ 0.61              |
|                             | 150 $\mu\text{g mL}^{-1}$ | 7.20 $\pm$ 0.49              |           | 150 $\mu\text{g mL}^{-1}$ | 6.90 $\pm$ 0.45              |

**Supp 2-1** Antiplatelet aggregation activities of compounds 1-7, 10, 11, 17, 20, 23

| Samples              | Dosage                    | Inhibition rate (%) <sup>a</sup> |
|----------------------|---------------------------|----------------------------------|
| Aspirin <sup>b</sup> | 250 $\mu\text{g mL}^{-1}$ | 83.67 $\pm$ 3.25                 |
| <b>1</b>             | 250 $\mu\text{g mL}^{-1}$ | 84.01 $\pm$ 4.01                 |
| <b>2</b>             | 250 $\mu\text{g mL}^{-1}$ | 78.12 $\pm$ 2.16                 |
| <b>3</b>             | 250 $\mu\text{g mL}^{-1}$ | 61.03 $\pm$ 4.38                 |
| <b>4</b>             | 250 $\mu\text{g mL}^{-1}$ | 15.68 $\pm$ 16.27                |
| <b>5</b>             | 250 $\mu\text{g mL}^{-1}$ | 67.2 $\pm$ 3.52                  |
| <b>6</b>             | 250 $\mu\text{g mL}^{-1}$ | 37.41 $\pm$ 8.22                 |
| <b>7</b>             | 250 $\mu\text{g mL}^{-1}$ | 99.83 $\pm$ 2.62                 |
| <b>10</b>            | 250 $\mu\text{g mL}^{-1}$ | 89.59 $\pm$ 3.15                 |
| <b>11</b>            | 250 $\mu\text{g mL}^{-1}$ | 12.6 $\pm$ 21.58                 |
| <b>17</b>            | 250 $\mu\text{g mL}^{-1}$ | 70.81 $\pm$ 1.99                 |
| <b>20</b>            | 250 $\mu\text{g mL}^{-1}$ | 24.18 $\pm$ 2.68                 |
| <b>23</b>            | 250 $\mu\text{g mL}^{-1}$ | 15.6 $\pm$ 5.66                  |

**Supp 2-2** Antiplatelet aggregation activities of compounds **8, 12, 13, 15, 16, 18, 19, 21, 22, 24** and **25** from the reference

| Samples              | Dosage                    | Inhibition rate (%) <sup>a</sup> | reference |
|----------------------|---------------------------|----------------------------------|-----------|
| Aspirin <sup>b</sup> | 250 $\mu\text{g mL}^{-1}$ | 82.64 $\pm$ 4.65                 | 15        |
| <b>8</b>             | 0.25 mg mL <sup>-1</sup>  | 73.61 $\pm$ 2.22                 | 24        |
| <b>12</b>            | 0.4 mg mL <sup>-1</sup>   | 38.75 $\pm$ 1.11                 | 8         |
| <b>13</b>            | 0.25 mg mL <sup>-1</sup>  | 0.87 $\pm$ 2.27                  | 8         |
| <b>15</b>            | 0.25 mg mL <sup>-1</sup>  | 84.50 $\pm$ 4.56                 | 24        |
| <b>16</b>            | 0.4 mg mL <sup>-1</sup>   | 29.18 $\pm$ 1.33                 | 8         |
| <b>18</b>            | 0.4 mg mL <sup>-1</sup>   | 39.18 $\pm$ 1.23                 | 8         |
| <b>19</b>            | 0.4 mg mL <sup>-1</sup>   | 30.7 $\pm$ 2.21                  | 8         |
| <b>21</b>            | 0.25 mg mL <sup>-1</sup>  | 8.93 $\pm$ 10.49                 | 15        |
| <b>22</b>            | 0.4 mg mL <sup>-1</sup>   | 63.26 $\pm$ 7.29                 | 15        |
| <b>24</b>            | 0.25 mg mL <sup>-1</sup>  | 74.00 $\pm$ 4.51                 | 15        |
| <b>25</b>            | 0.4 mg mL <sup>-1</sup>   | 7.38 $\pm$ 2.05                  | 8         |

**Supp 3-1** Antithrombotic activity of compounds **1, 7, 12** on transgenic zebrafish system

| Smample        | Dosage                    | Inhibition rate (%) |
|----------------|---------------------------|---------------------|
| control        | 0.1%DMSO                  | 4.40 $\pm$ 0.40     |
| Heparin Sodium | 20 U ml <sup>-1</sup>     | 11.40 $\pm$ 0.51*   |
| <b>1</b>       | 50 $\mu\text{g mL}^{-1}$  | 5.80 $\pm$ 0.73     |
|                | 150 $\mu\text{g mL}^{-1}$ | 5.40 $\pm$ 0.51     |
| <b>7</b>       | 50 $\mu\text{g mL}^{-1}$  | 5.60 $\pm$ 0.40     |
|                | 150 $\mu\text{g mL}^{-1}$ | 4.20 $\pm$ 0.20     |
| <b>12</b>      | 50 $\mu\text{g mL}^{-1}$  | 6.00 $\pm$ 0.89     |
|                | 150 $\mu\text{g mL}^{-1}$ | 6.00 $\pm$ 0.45*    |

**Supp 3-2** Antithrombotic activity of compounds **8, 15, 22, 24** on transgenic zebrafish system from the reference

| Smample   | Dosage                    | Inhibition rate (%) | reference |
|-----------|---------------------------|---------------------|-----------|
| <b>8</b>  | 50 $\mu\text{g mL}^{-1}$  | 6.80 $\pm$ 1.07     | 24        |
|           | 150 $\mu\text{g mL}^{-1}$ | 5.80 $\pm$ 0.49     |           |
| <b>15</b> | 50 $\mu\text{g mL}^{-1}$  | 6.40 $\pm$ 0.24     | 24        |
|           | 150 $\mu\text{g mL}^{-1}$ | 5.60 $\pm$ 0.24     |           |
| <b>22</b> | 50 $\mu\text{g mL}^{-1}$  | 6.60 $\pm$ 0.51     | 15        |
|           | 100 $\mu\text{g mL}^{-1}$ | 5.40 $\pm$ 0.51     |           |
| <b>24</b> | 50 $\mu\text{g mL}^{-1}$  | 6.60 $\pm$ 0.75     | 15        |
|           | 100 $\mu\text{g mL}^{-1}$ | 8.80 $\pm$ 0.37*    |           |

**Supp 4** The base peak intensity (BPI) chromatogram of 25 compounds under positive ion mode.

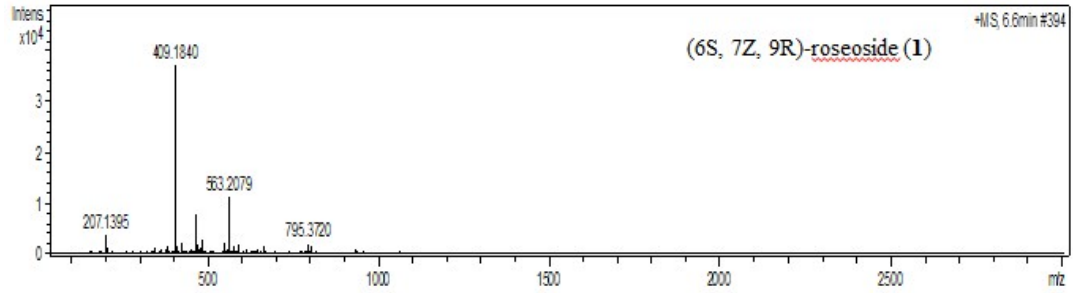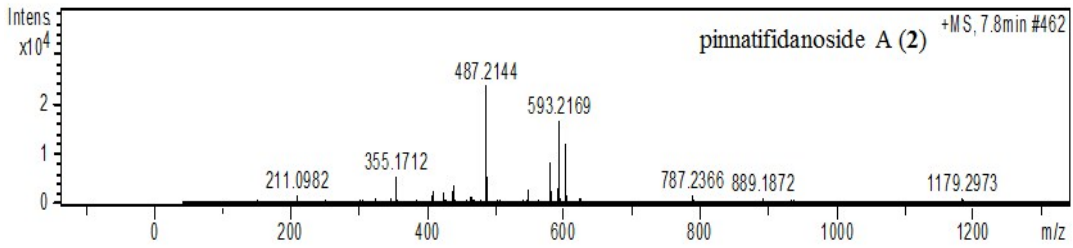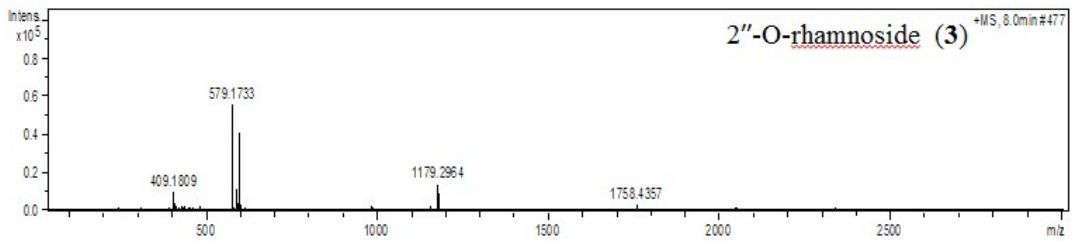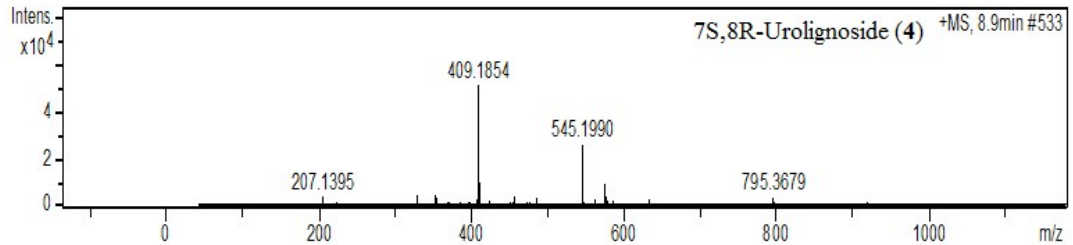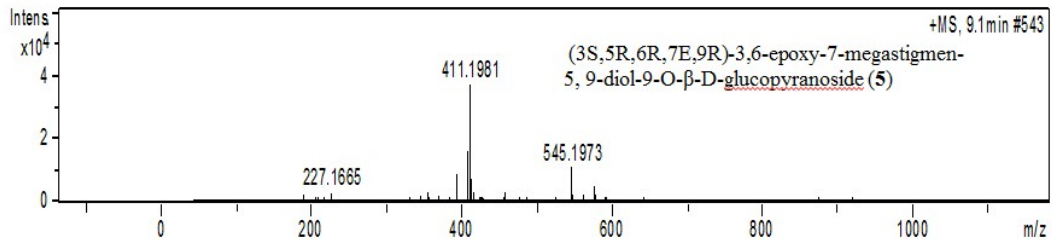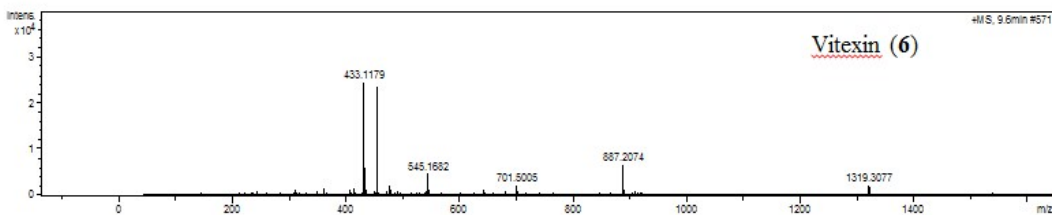

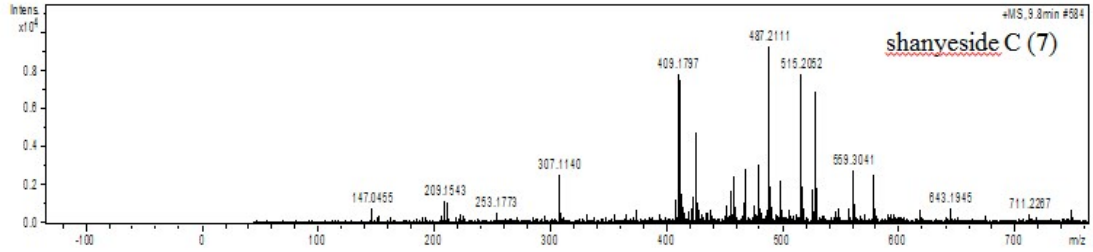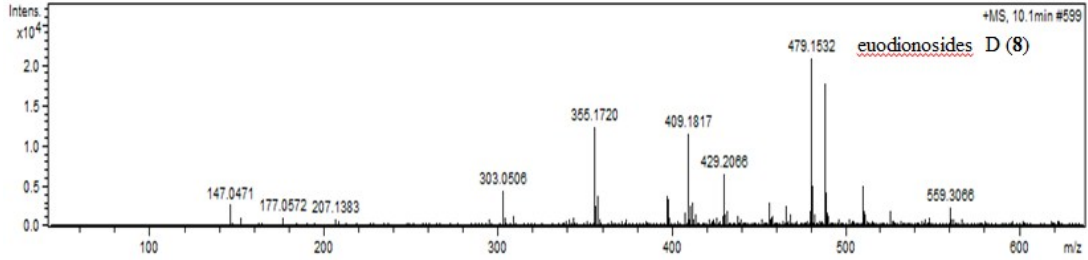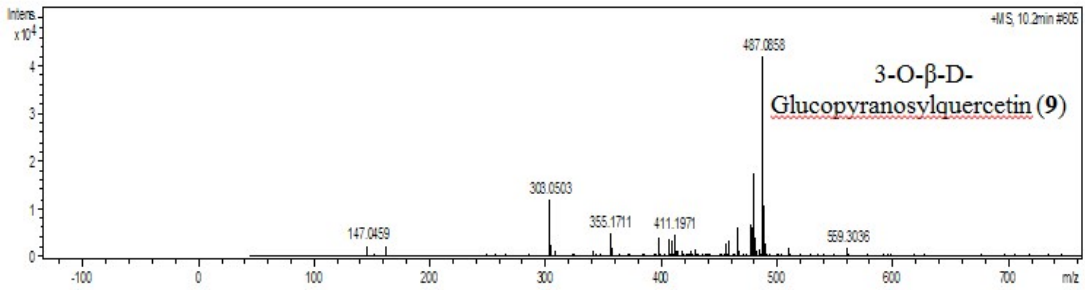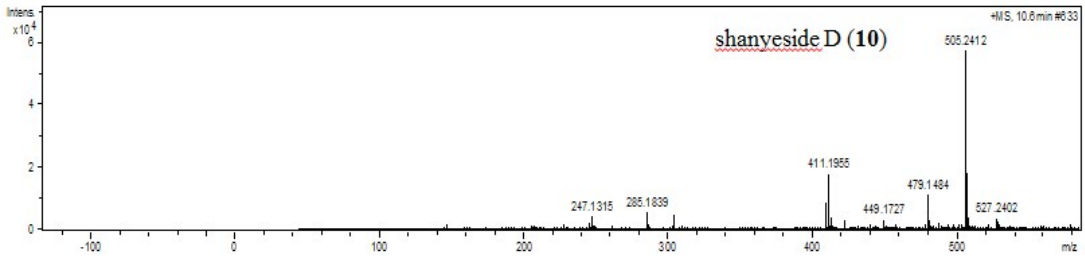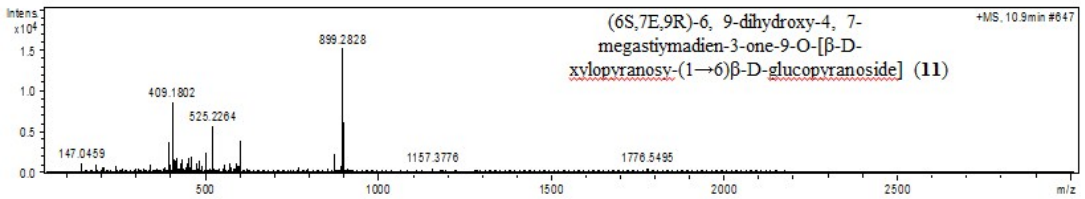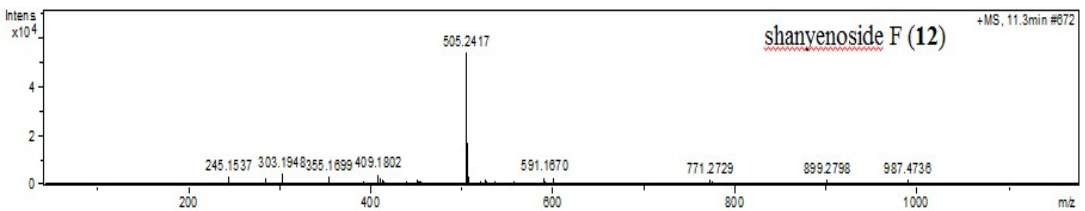

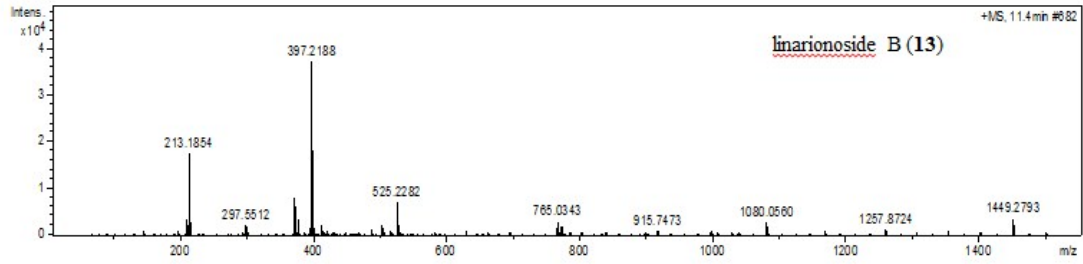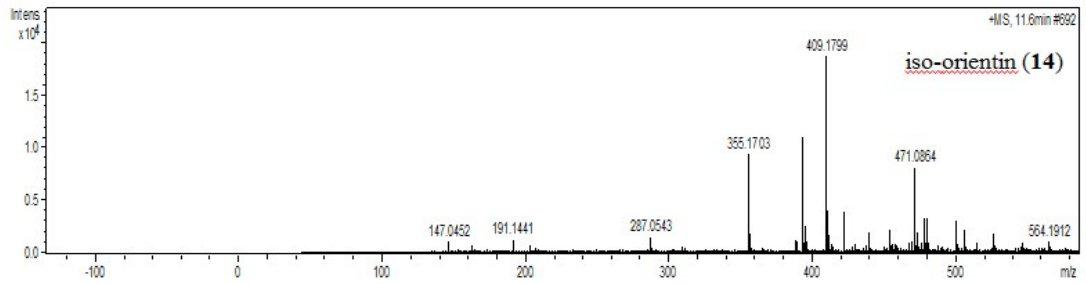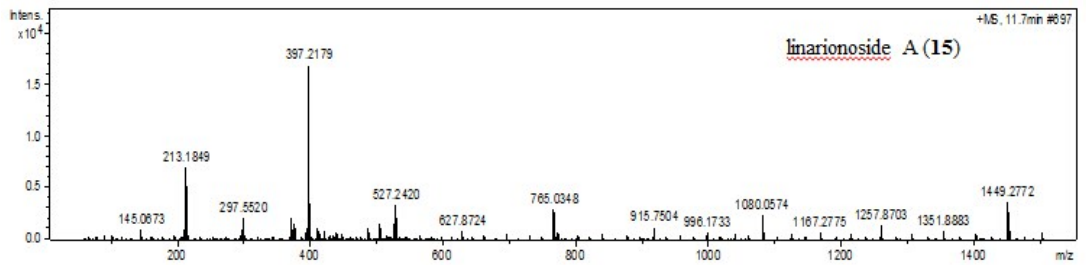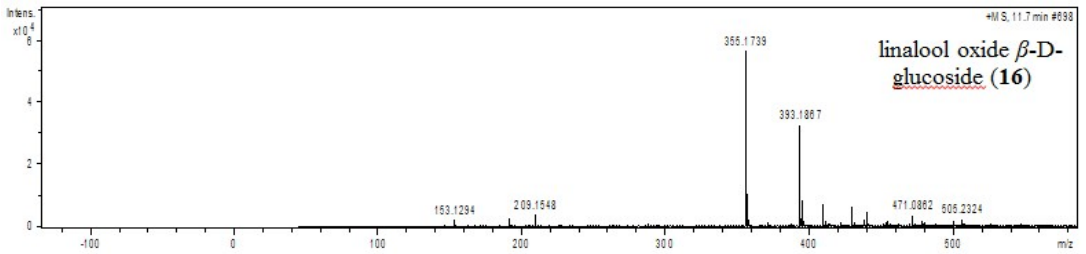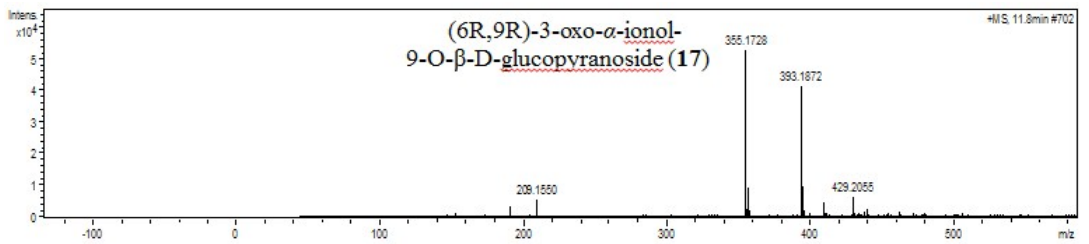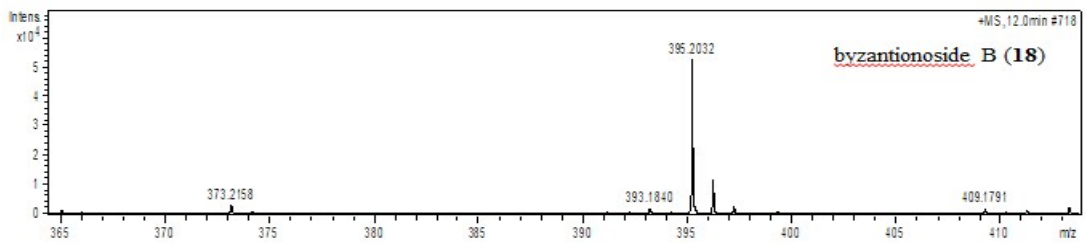

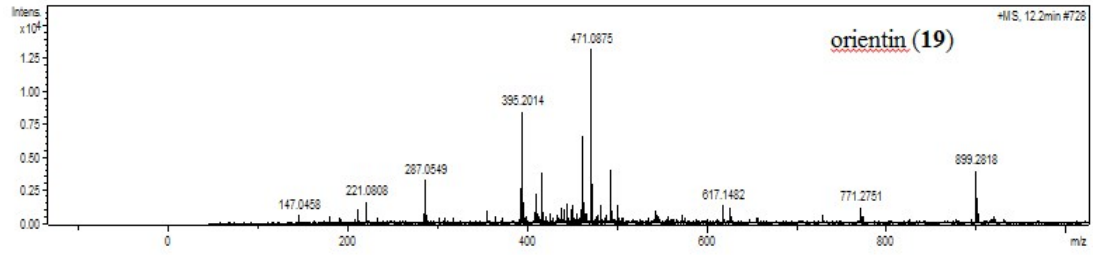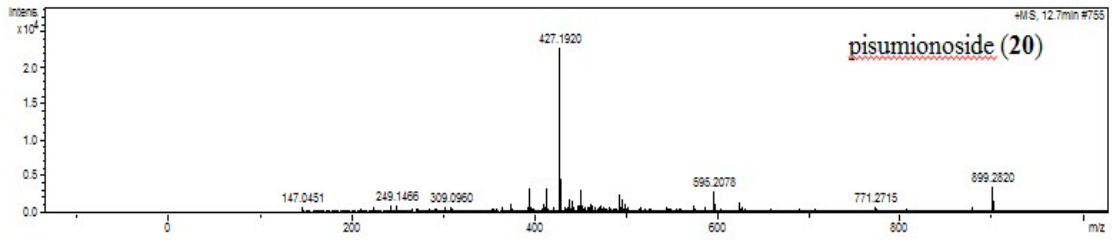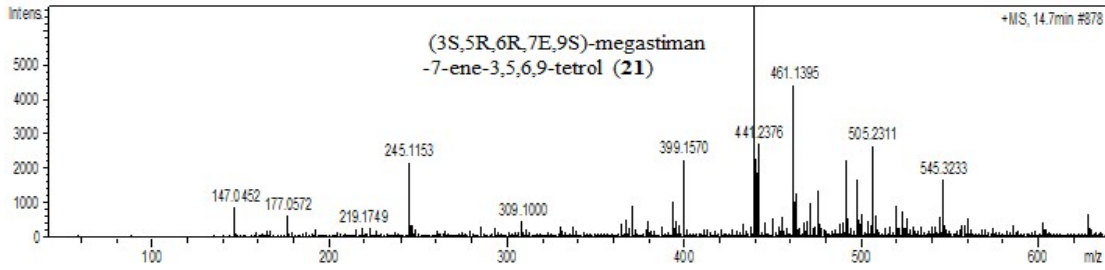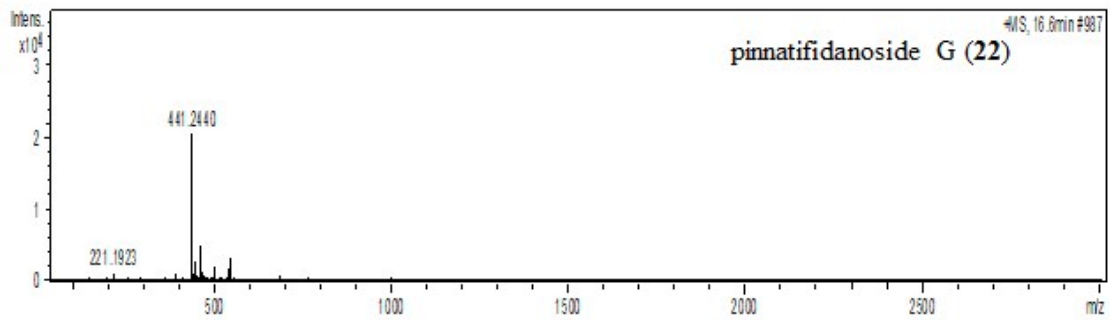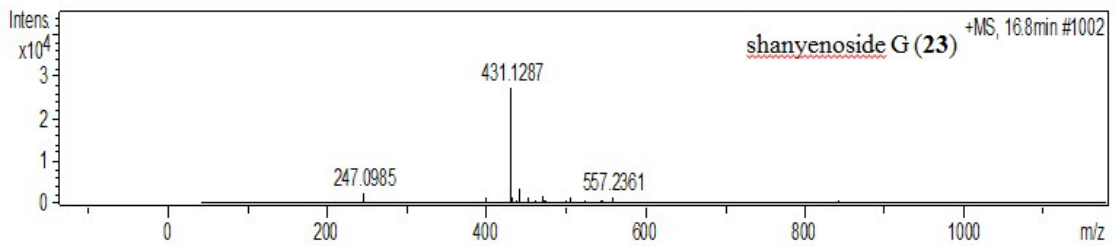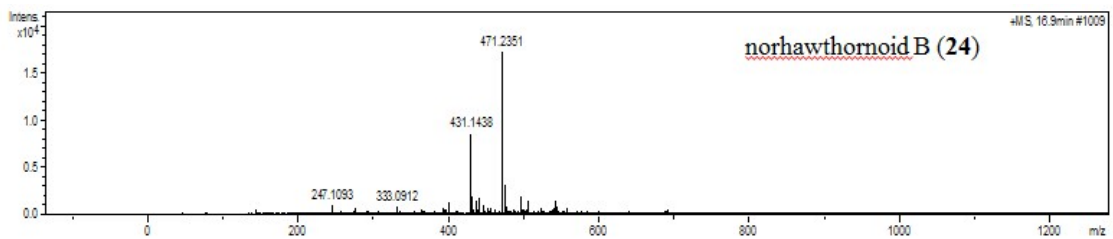

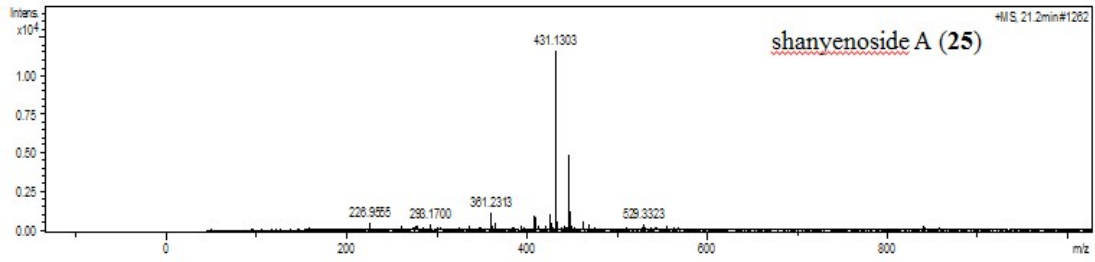

**Supp 5** The base peak intensity (BPI) chromatogram of mixed reference compounds in positive ion mode by HPLC-QTOF-MS. The mixed A were reference compounds **1-7, 9-11, 24**. The mixed B were reference compounds **12, 14-17, 19-23**.

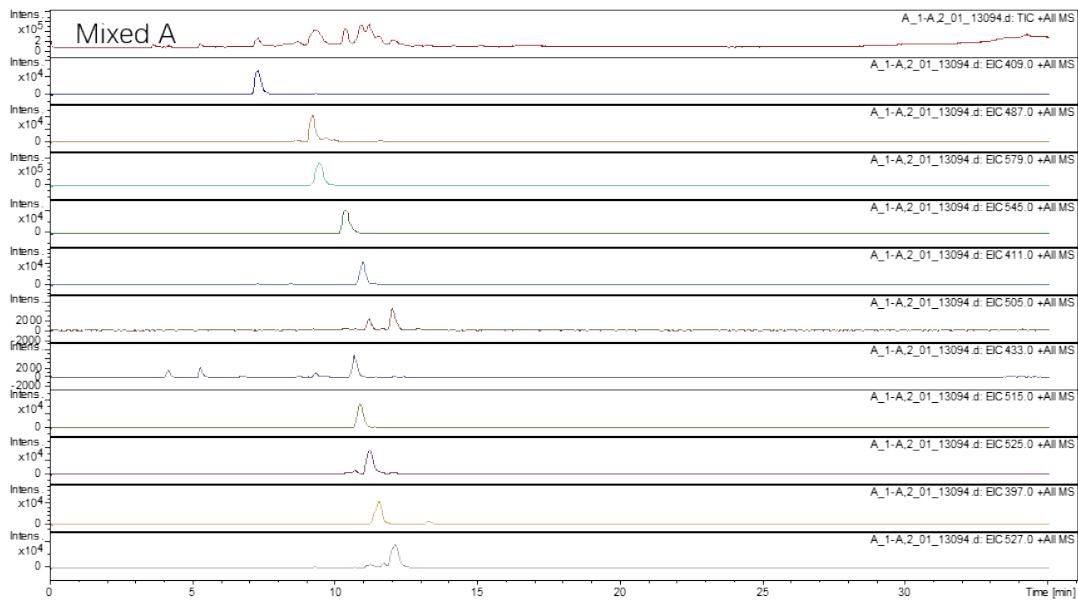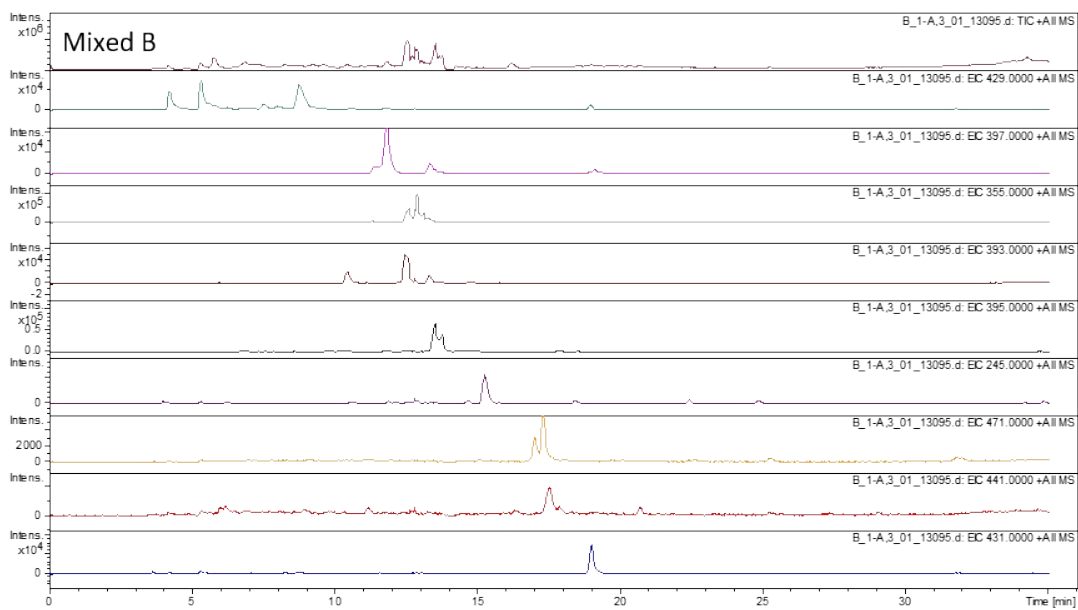

Supplement: c8fo01862f1.pdf [file c8fo01862f1.pdf]
